# Supplementary material
Source: Elsevier journal article supplement (https://www.sciencedirect.com/science/article/pii/S2603647921000324)
Supplement: mmc1 [file S2603647921000324:mmc1.doc]

**Anexo 1. Comparación entre los ítems del Cuestionario AGRASS adaptado y el original**

| **ORIGINAL** |  | **VERSIÓN ADAPTADA AL CASTELLANO** |
| --- | --- | --- |
| **Questionário AGRASS – Avaliação Da Gestão De Riscos Assistenciais Em Serviços De Saúde** |  | **Cuestionario AGRASS – Evaluación De La Gestión De Riesgos Asistenciales En Servicios De Salud** |
| PARTE I - ESTRUTURA PARA A GESTÃO DE RISCOS ASSISTENCIAIS |  | PARTE I - ESTRUCTURA PARA LA GESTIÓN DE RIESGOS ASISTENCIALES |
| 1. A instituição promoveu alguma ação de sensibilização para a segurança do paciente nos últimos 12 meses (evento, campanha, etc.)? |  | 1. ¿La institución promovió alguna acción de sensibilización para la seguridad del paciente en los últimos 12 meses (evento, campaña, etc.)? |
| 2. Existem na instituição cartazes, folders, pôsteres ou vídeos chamando atenção para a segurança do paciente? |  | 2. ¿Existen en la institución carteles, folletos, afiches o vídeos haciendo énfasis en la seguridad del paciente? |
| 3. Existe uma unidade organizacional responsável por coordenar as ações de segurança do paciente (chamada a partir de agora de Núcleo de Segurança do Paciente - NSP)? |  | 3. ¿Existe una unidad organizacional de acuerdo con la estructura de cada institución, responsable de coordinar las acciones de seguridad del paciente (llamada a partir de ahora Unidad de Seguridad del Paciente – USP)? |
| 4. Foi nomeado um coordenador do NSP? |  | 4. ¿Existe nombrado un coordinador o jefatura de la USP? |
| 5. Existe um Plano de Segurança do Paciente em execução? |  | 5. ¿Existe un Plan de Seguridad del Paciente en ejecución? |
| 6. A instituição dispõe de profissionais com dedicação de carga horária formal às atividades de gestão de riscos assistenciais? |  | 6. ¿La institución dispone de profesionales con jornada exclusiva para las actividades de gestión de riesgos asistenciales? |
| 7. O NSP dispõe de infraestrutura para o seu funcionamento? |  | 7. ¿La USP dispone de infraestructura para su funcionamiento? |
| 8. A instituição provê insumos para as ações de gestão de riscos assistenciais? |  | 8. ¿La institución provee insumos para las acciones de gestión de riesgos asistenciales? |
| 9. A instituição promoveu aos seus profissionais capacitação na área (gestão de riscos, gestão da qualidade, segurança do paciente etc.)? |  | 9. ¿La institución brindó a sus profesionales capacitación en el área (gestión de riesgos, gestión de la calidad, seguridad del paciente etc.)? |
| 10. Avaliou a cultura de segurança do paciente nos últimos 24 meses? |  | 10. ¿La organización evaluó la cultura de seguridad del paciente en los últimos 2 años? |
| 11. Comunicou os resultados da avaliação da cultura de segurança do paciente às lideranças clínicas, administrativas e os profissionais da assistência? |  | 11. ¿La organización comunicó los resultados de la evaluación de la cultura de seguridad del paciente a los coordinadores clínicos, técnicos, administrativos y profesionales asistenciales? |
| 12. Implantou alguma intervenção para melhorar os resultados identificados na avaliação da cultura de segurança do paciente? |  | 12. ¿La organización implementó algún plan de mejora o intervención para optimizar los resultados identificados en la evaluación de la cultura de seguridad del paciente? |
| **PARTE II - PROCESSOS DA GESTÃO DE RISCOS ASSISTENCIAIS** |  | **PARTE II - PROCESOS DE LA GESTIÓN DE RIESGOS ASISTENCIALES** |
| 13. Utiliza um sistema interno de notificação de incidentes? |  | 13. ¿Utiliza un sistema interno de notificación de incidentes? |
| 14. Divulgou entre os profissionais uma lista de eventos sentinela ou never events para notificação? |  | 14. ¿Divulgó entre los profesionales una lista de eventos centinela o eventos adversos graves para su notificación? |
| 15. Monitora indicadores de adesão às metas internacionais de segurança do paciente? (anexar comprovante para cada item) |  | 15. ¿Monitorea indicadores de adhesión a las metas internacionales de seguridad del paciente? (adjuntar comprobante para cada ítem) |
| 16. Utiliza informações das queixas e reclamações (ouvidoria) para identificação de riscos? |  | 16. ¿Utiliza informaciones de las quejas y reclamamos para identificación de riesgos? |
| 17. Utiliza indicadores rastreadores (pistas da existência de incidentes de segurança) ou de resultado para identificar riscos? |  | 17. ¿Utiliza indicadores de trazabilidad/monitoreo activo incidentes o de resultado para identificar riesgos? |
| 18. Utiliza as informações da comissão de revisão de óbito para identificação de riscos? |  | 18. ¿Utiliza la información del comité o grupo de análisis de mortalidad institucional para la identificación de riesgos? |
| 19. Analisa os processos litigiosos da instituição para identificação de risco? |  | 19. ¿Analiza los procesos judiciales de la institución para la identificación de riesgos? |
| 20. Utiliza observação direta para identificar riscos? (ex. observação da higiene das mãos, de precauções de contato com pacientes em isolamento, de barreiras de proteção na inserção de CVC, etc.)? |  | 20. ¿Utiliza instrumentos de evaluación por observación directa para identificar riesgos? (por ejemplo, observación de la higiene de manos, de precauciones de contacto con pacientes en aislamiento, de barreras de protección en la inserción de Catéter Venoso Central - CVC, etc)? |
| 21. Utiliza sistema eletrônico de alerta em prontuário eletrônico (ex. interações medicamentosas, recomendações padronizadas de alta para pacientes específicos, etc.)? |  | 21. ¿Utiliza sistema electrónico de alerta en historial médico electrónico (por ejemplo, interacciones medicamentosas, recomendaciones estandarizadas de alta para pacientes específicos, etc)? |
| 22. Utiliza checklists ou listas de verificação para a segurança do paciente? |  | 22. ¿Utiliza listas de cotejo o verificación para la seguridad del paciente? |
| 23. Realizou mapeamento de riscos do serviço de saúde? |  | 23. ¿Ha realizado un mapeo de riesgos del servicio de salud? |
| 24. Realizam-se rondas de segurança do paciente nos setores para identificar riscos? |  | 24. ¿Se realizan rondas de seguridad del paciente en los servicios o unidades para identificar riesgos? |
| 25. Utiliza fonte externa para a identificação de riscos (ex. alertas sanitários, notícias na mídia, etc.)? |  | 25. ¿Utiliza las fuentes externas de información para la identificación de riesgos (por ejemplo, alertas sanitarias, noticias en los medios, etc)? |
| 26. Realizou análise de fatores contribuintes para algum evento adverso nos últimos 12 meses? |  | 26. ¿La organización realizó un análisis de factores contribuyentes de algún evento adverso en los últimos 12 meses? |
| 27. Utiliza ferramentas de análise qualitativa das causas e fatores contribuintes (fluxograma, diagrama de causa-efeito, análise de campo de força, bow tie, brainstorming, etc.)? |  | 27. ¿Utiliza herramientas de análisis cualitativo de las causas y factores contribuyentes (diagrama de flujo, diagrama de causa-efecto, análisis de campo de fuerza, visualización del riesgo, lluvia de ideas, etc.)? |
| 28. Utiliza ferramentas de análise quantitativa das causas ou fatores contribuintes dos riscos (histograma, estratificação, diagrama de Pareto e gráfico de controle)? |  | 28. ¿Utiliza herramientas de análisis cuantitativo de las causas o factores contribuyentes de los riesgos (histograma, estratificación, diagrama de Pareto y gráfico de control)? |
| 29. Utiliza alguma matriz de priorização de riscos baseada em critérios de gravidade e frequência? |  | 29. ¿Utiliza alguna matriz de priorización de riesgos basada al menos en criterios de gravedad y frecuencia? |
| 30. Implantou protocolos básicos para a segurança do paciente? (anexar comprovante para cada item) |  | 30. ¿Ha implantado protocolos básicos para la seguridad del paciente? (adjuntar comprobante para cada ítem) |
| 31. Implementou ações de redução de risco em reação a eventos adversos investigados? |  | 31. ¿Ha implementado acciones de reducción de riesgo producto de eventos adversos investigados? |
| 32. Apresenta plano de ação completo (cronograma, responsáveis, recursos e indicadores) para as ações de redução de riscos? |  | 32. ¿Presenta plan de acción completo (cronograma, responsables, recursos e indicadores) para las acciones de reducción de riesgos? |
| 33. Alta gestão • Sim • Não |  | 33. ¿Alta gestión? |
| 34.  Média gestão e lideranças clínicas |  | 34. ¿Media gestión y líderes clínicos? |
| 35.Profissionais da assistência |  | 35. ¿Profesionales de la asistencia? |
| 36. A comunicação aos pacientes sobre os eventos adversos (revelação aberta de erros) está padronizada mediante alguma norma, protocolo ou política institucional? |  | 36. ¿La comunicación a los pacientes sobre los eventos adversos (revelación abierta de errores) está estandarizada mediante alguna norma, protocolo o política institucional? |
| 37. Realiza notificação externa pelo sistema NOTIVISA (assistência à saúde) mensalmente? |  | 37. Eliminado |
| 38. Realizou ciclo completo de gestão de riscos (identificação, análise, avaliação, tratamento e monitoramento) ou ciclo de melhoria da qualidade focado na segurança do paciente (PDCA, ciclo de avaliação e melhoria) nos últimos 12 meses? |  | 38. ¿Realizó un ciclo completo de gestión de riesgos (identificación, análisis, evaluación, tratamiento y monitoreo) o ciclo de mejora de la calidad centrado en la seguridad del paciente (PDCA, ciclo de evaluación y mejora) en los últimos 12 meses? |
| 39. Realizou Análise de Causa-Raiz (ACR) ou Protocolo de Londres nos últimos 12 meses? |  | 39. ¿Ha realizado un análisis de causa-raíz (ACR) o Protocolo de Londres en los últimos 12 meses? |
| 40. Realizou Análise dos Modos de Falhas e Efeitos (AMFE ou FMEA) nos últimos 12 meses? |  | 40. ¿Ha realizado análisis de los modos de fallas y efectos (AMFE o FMEA) en los últimos 12 meses? |
